# Supplementary material for: Core–shell Cu@rGO hybrids filled in epoxy composites with high thermal conduction
Source: Royal Society of Chemistry journal article supplement (doi:10.1039/c7tc04427e), 2017-12-04
Supplement: c7tc04427e1.pdf [file c7tc04427e1.pdf]

## Supplementary Information

### **Core-Shell Cu@rGO Hybrids Filled in Epoxy Composites with High Thermal Conduction**

Shaoqing Liu,<sup>a,b</sup> Bo Zhao,<sup>a</sup> Li Jiang,<sup>a,b</sup> Yan-Wu Zhu,<sup>b</sup> Xian-Zhu Fu,<sup>a,c\*</sup> Rong Sun,<sup>a\*</sup> Jian-Bin Xu,<sup>d</sup> Ching-Ping

Wong<sup>d,e</sup>

<sup>a</sup> Shenzhen Institutes of Advanced Technology, Chinese Academy of Sciences, Shenzhen, China

<sup>b</sup> Institute of Nano Science and Technology, University of Science and Technology of China, Suzhou, China

<sup>c</sup> College of Materials Science and Engineering, Shenzhen University, Shenzhen, China.

<sup>d</sup> Department of Electronics Engineering, The Chinese University of Hong Kong, Hong Kong, China

<sup>e</sup> School of Materials Science and Engineering, Georgia Institute of Technology, Atlanta, GA 30332, United States

\* Corresponding authors

E-mail addresses: xz.fu@szu.edu.cn, rong.sun@siat.ac.cn.

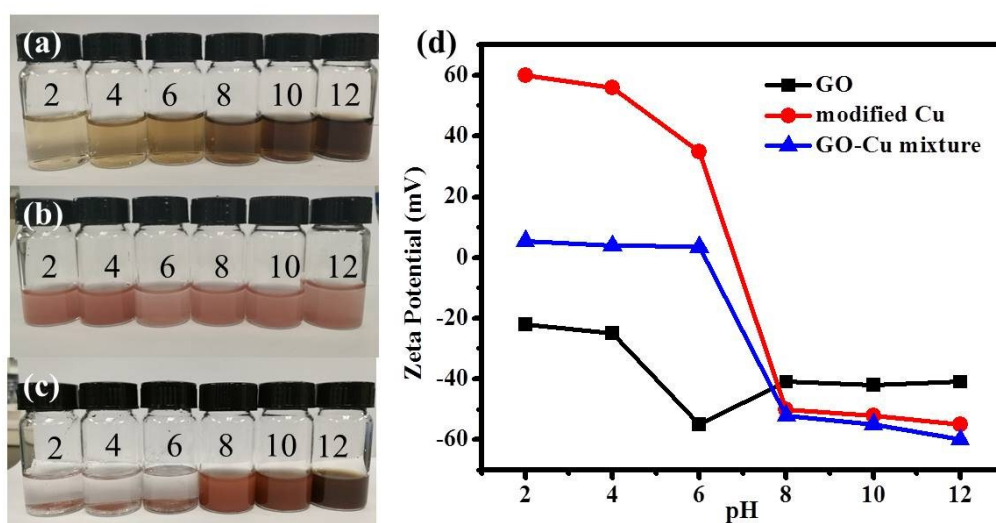

**Figure S1.** Digital photographs of (a) GO, (b) modified Cu and (c) modified Cu and GO mixture solution under pH=2, 4, 6, 8, 10, 12; (d) Zeta potentials of GO, modified Cu and modified Cu and GO mixture in aqueous solutions under different pH conditions.

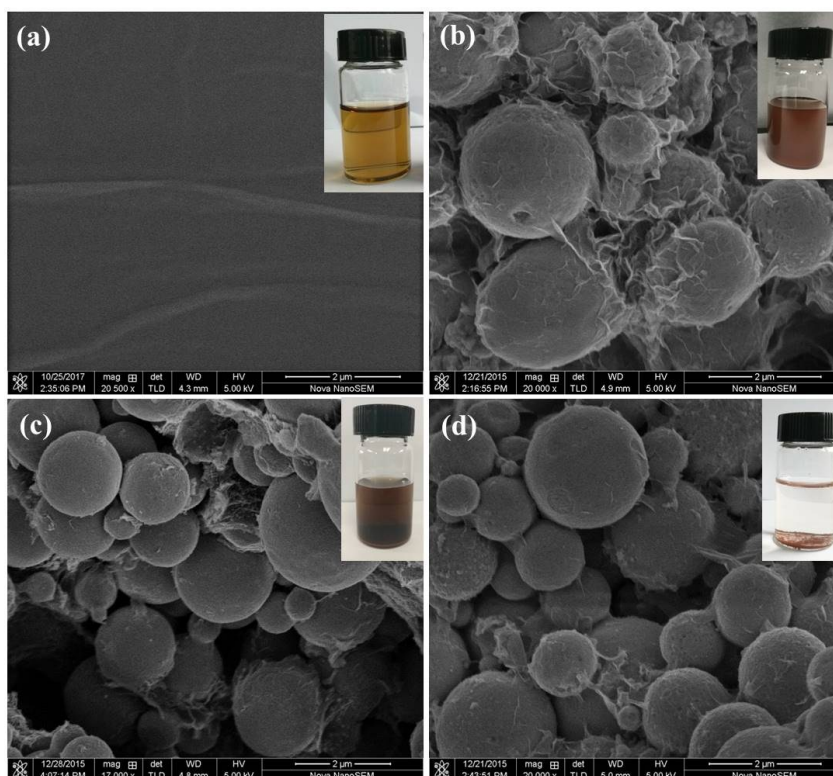

**Figure S2.** Images of the electrostatic assembly of GO with Cu-NH<sub>2</sub> at different mass ratios, (a) exfoliated GO sheets; (b) GO:Cu=1:10; (c) GO:Cu=1:30; (d) GO:Cu=1:50 (inserts are photographs of the corresponding aqueous suspension).

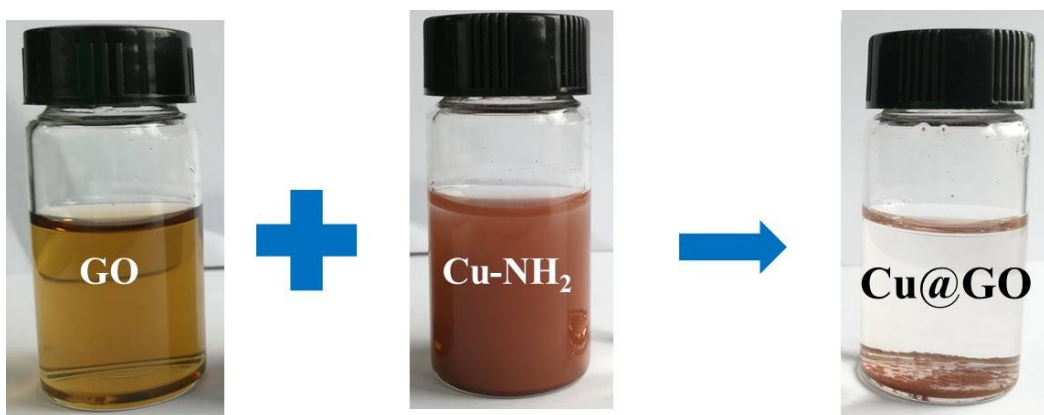

**Figure S3.** Photograph of the electrostatic assembly process of Cu@GO

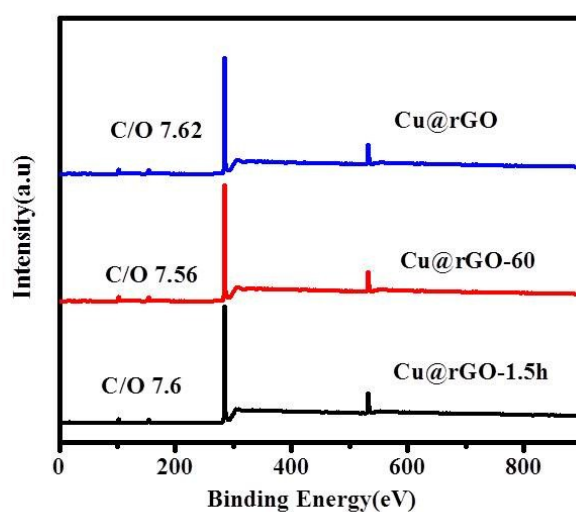

**Figure S4.** XPS survey spectra of the as-prepared Cu@rGO, Cu@rGO-60 and Cu@rGO-1.5h.

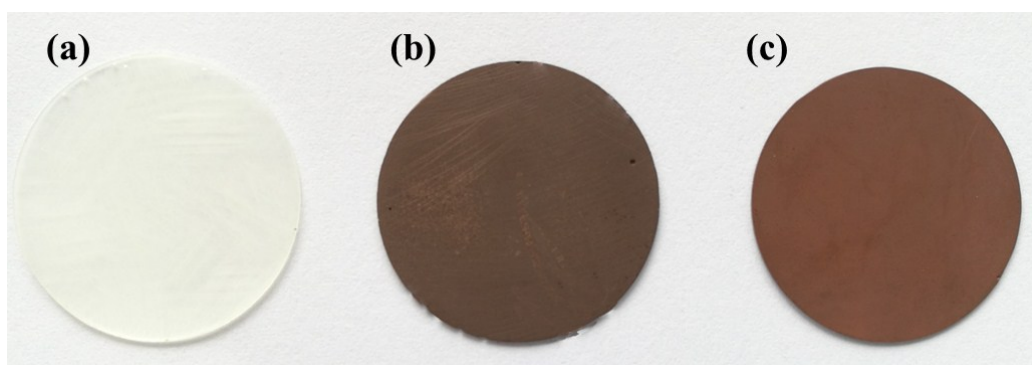

**Figure S5.** Optical morphologies of (a) Pure epoxy, (b) Cu@rGO/epoxy composites and c) Cu@rGO/epoxy composites.

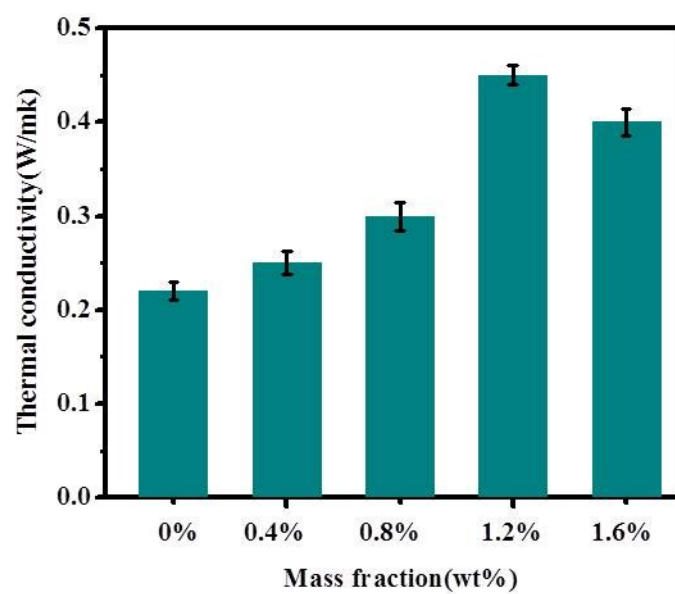

**Figure S6.** Thermal conductivity of rGO/epoxy composites with different mass fractions.

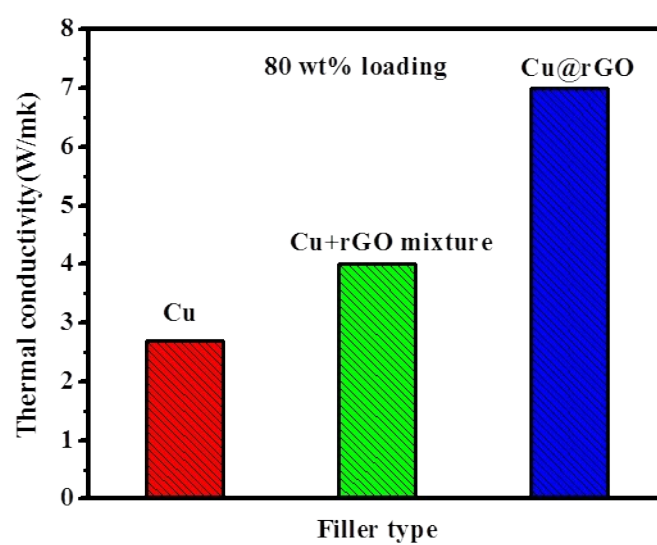

**Figure S7.** Comparison of the thermal conductivity of the epoxy composites with three kinds of filler.

**Table S1.** CTE values of different fillers

| Samples             | CTE1(ppm °C <sup>-1</sup> ) | CTE2(ppm °C <sup>-1</sup> ) |
|---------------------|-----------------------------|-----------------------------|
| Pure epoxy          | 74.4                        | 200.5                       |
| 80 wt% Cu/epoxy     | 51.6                        | 128.6                       |
| 80 wt% Cu@rGO/epoxy | 48                          | 124.3                       |
